# Supplementary material for: Constraining the relationships between aerosol height, aerosol optical depth and total column trace gas measurements using remote sensing and models
Source: Copernicus journal article supplement (doi:10.5194/acp-2019-1017), 2020-02-12

**Table S1: Statistical summary of MISR daily measurements over each of the 14 regions in this work, where mean is the average, STD is the standard deviation, and skewness is the skewness.**

|                            | Mean   | STD    | Skewness |
|----------------------------|--------|--------|----------|
| Central Africa             | 1.38km | 0.53km | 1.76km   |
| Midwest Africa             | 0.92km | 0.30km | 0.79km   |
| Southern Africa            | 1.67km | 0.40km | 0.46km   |
| Central Siberia            | 1.50km | 0.56km | 0.60km   |
| Siberia and Northern China | 1.09km | 0.44km | 0.75km   |
| Eastern Siberia            | 1.11km | 0.31km | -0.18km  |
| Western Siberia            | 1.06km | 0.58km | 0.99km   |
| Northern Southeast Asia    | 1.38km | 0.81km | 1.32km   |
| Northern Australia         | 0.91km | 0.45km | 1.91km   |
| Alaska                     | 1.62km | 0.71km | 0.93km   |
| Central Canada             | 1.80km | 0.98km | 1.23km   |
| South America              | 0.87km | 0.38km | 1.36km   |
| Argentina                  | 0.63km | 0.40km | 2.48km   |
| Eastern Europe             | 1.24km | 0.78km | 1.52km   |

**Figure S1: time series of different satellite products over all regions (top panel is MISR measurements, median is MOPITT CO measurements, bottom is OMI NO<sub>2</sub> measurements and black line is move mean value using seven days)**

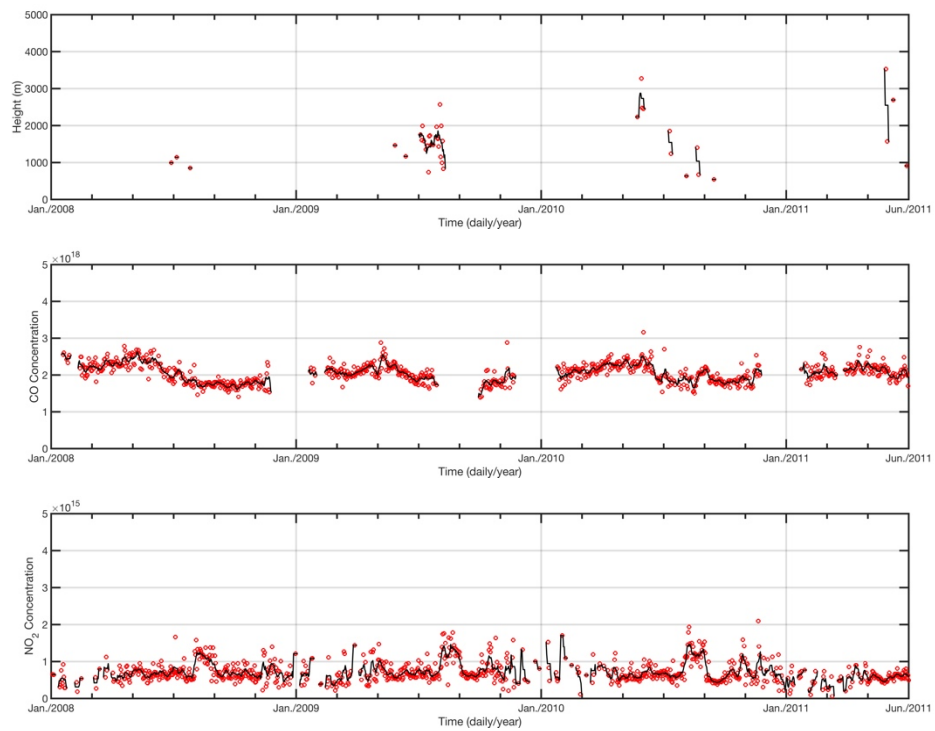

## (1) Alaska

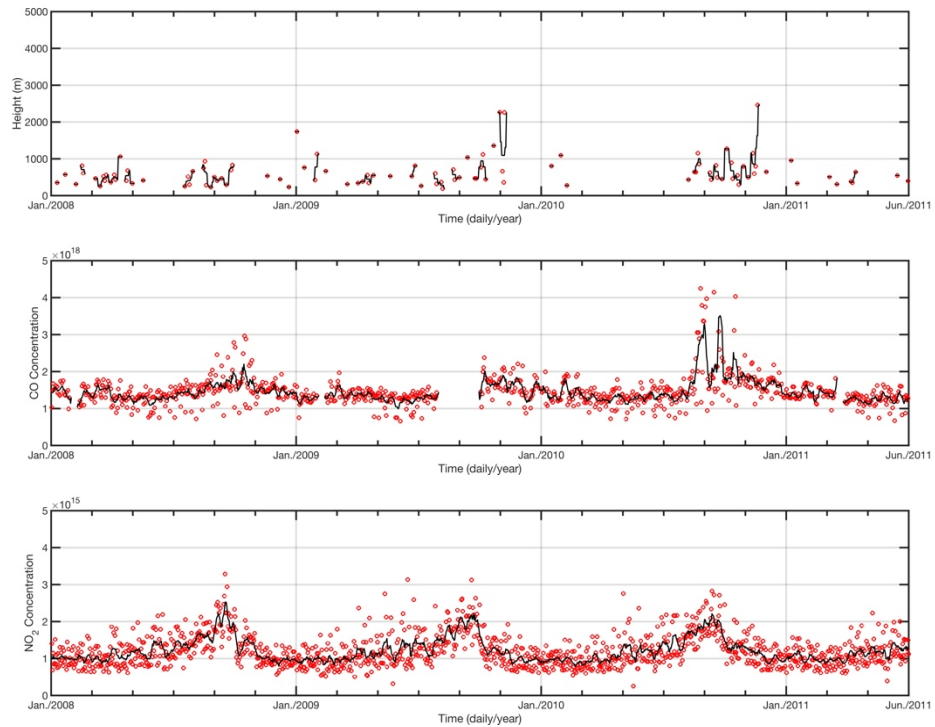

## (2) Argentina

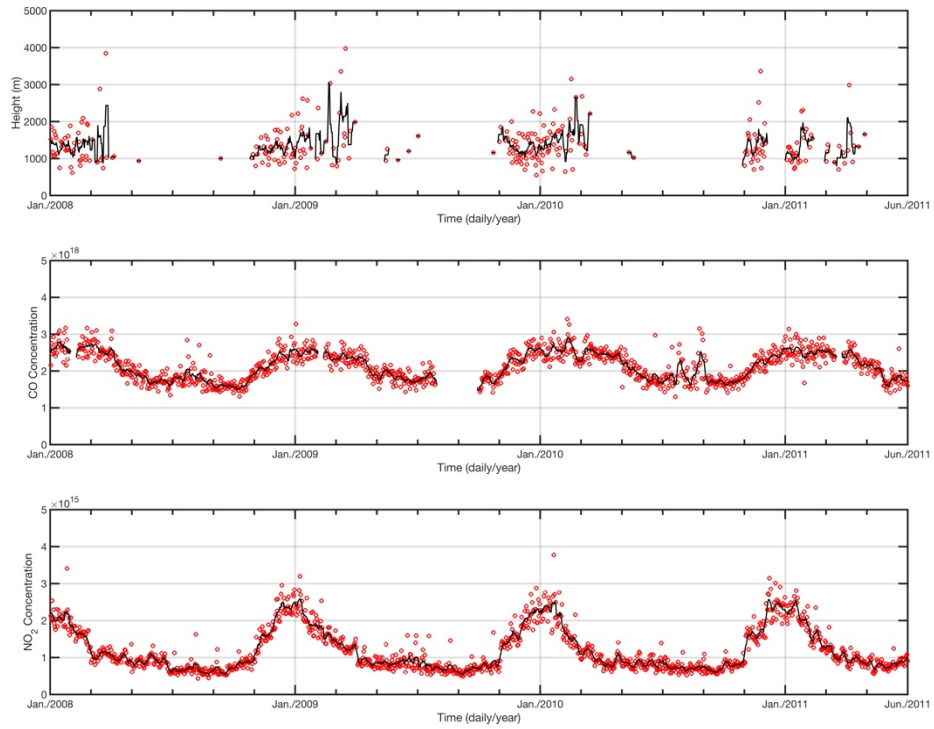

### (3) Central Africa

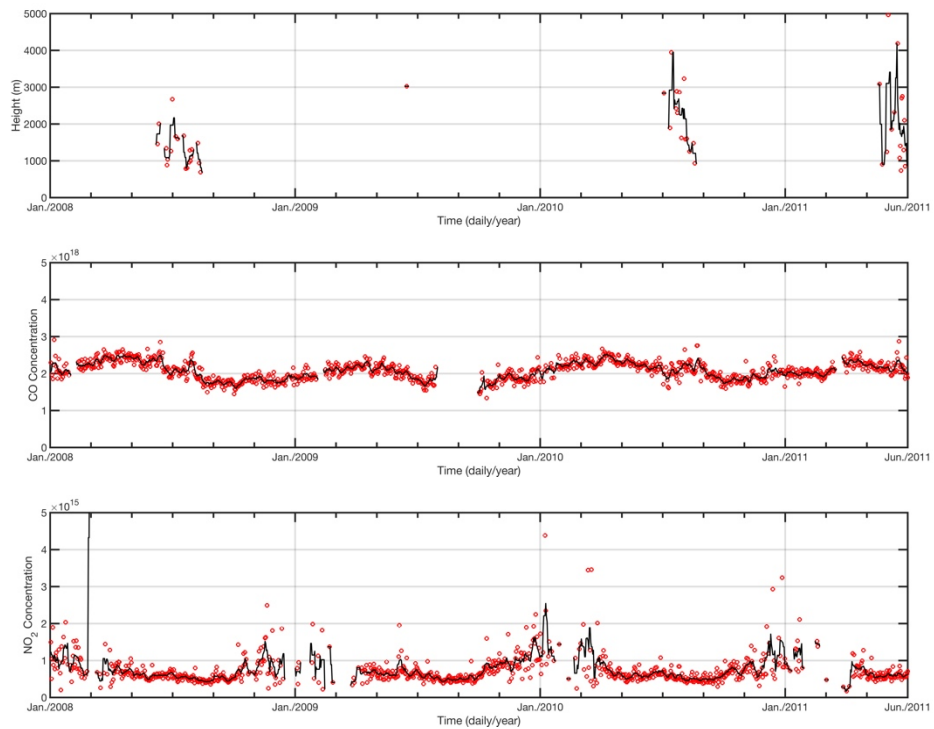

### (4) Central Canada

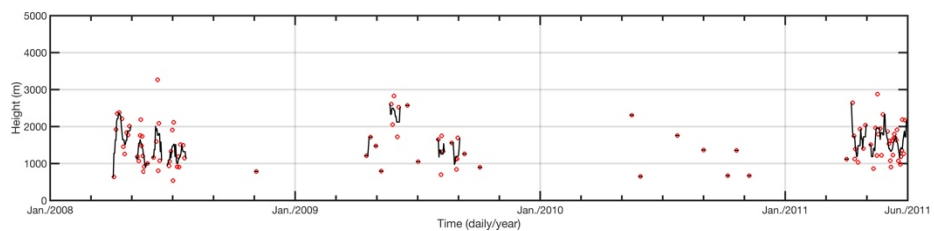

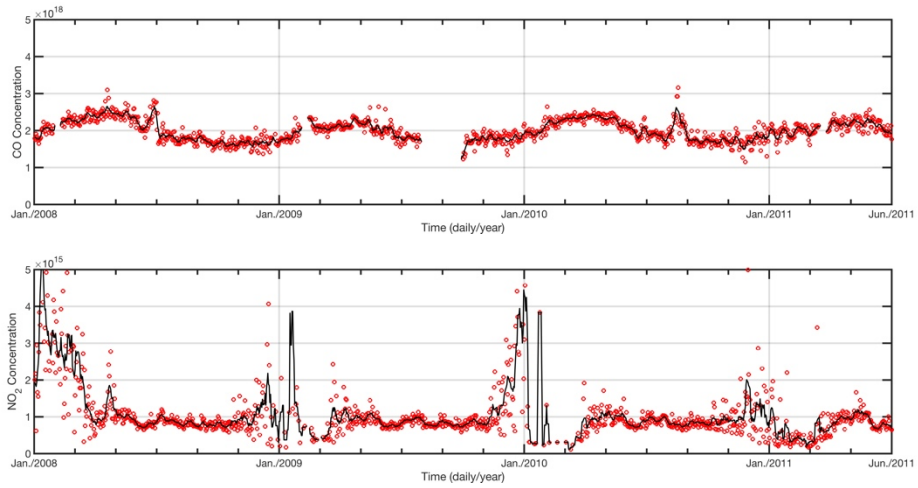

## (5) Central Siberia

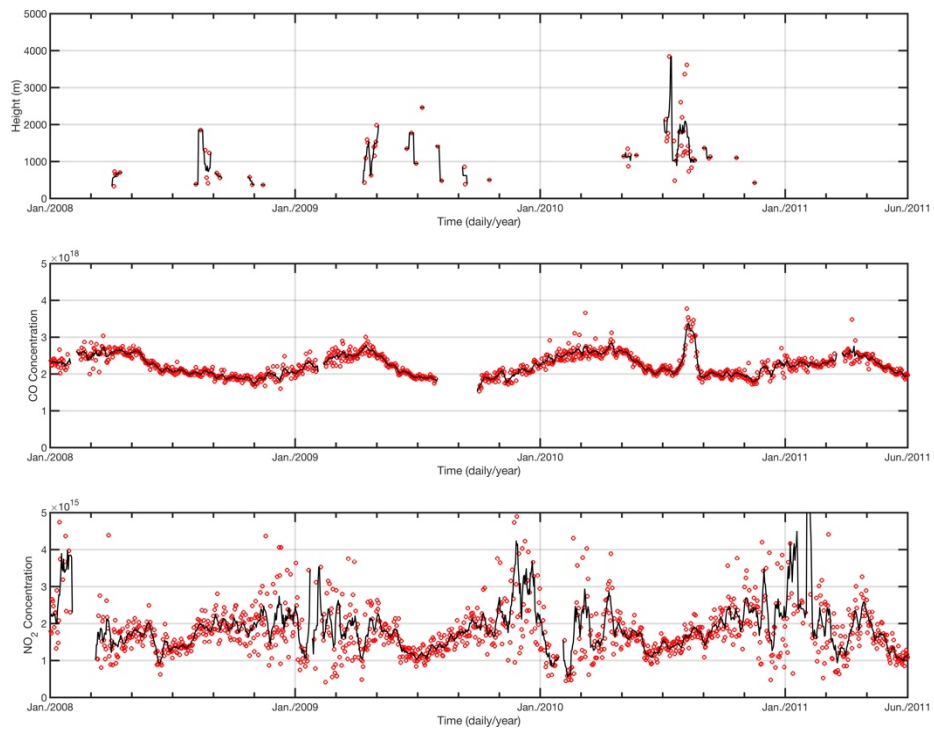

## (6) East Europe

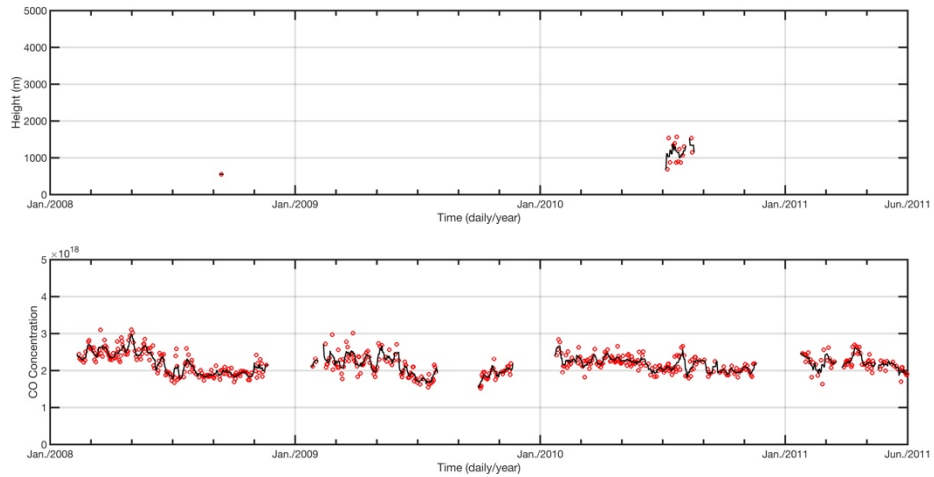

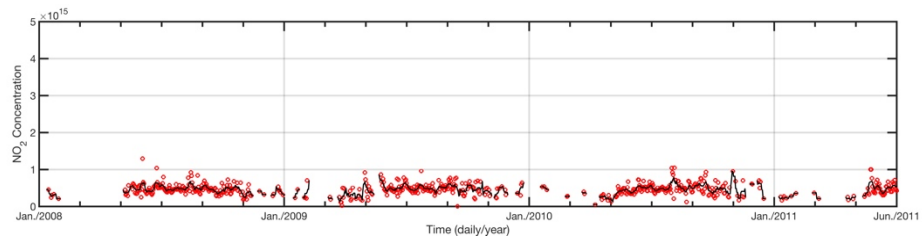

## (7) East Siberia

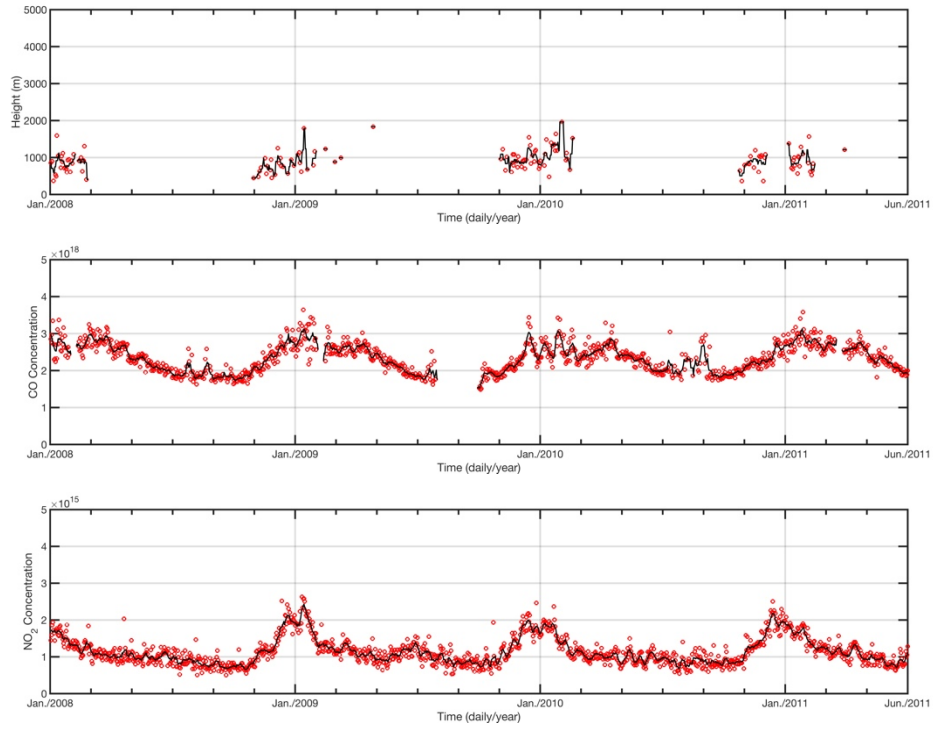

## (8) Midwest Africa

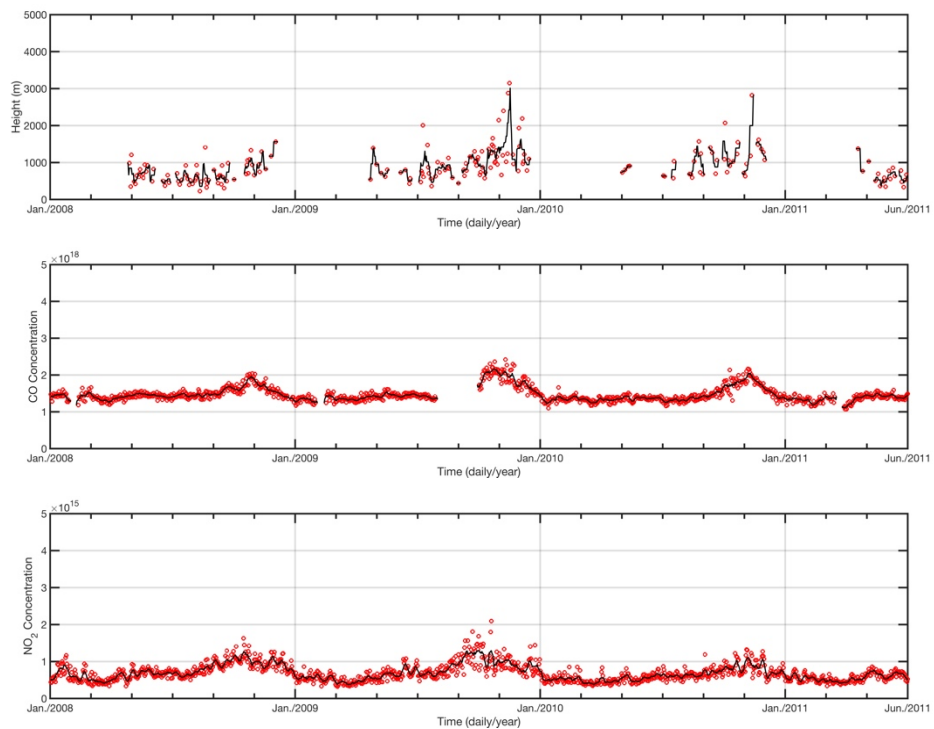

## (9) Northern Australia

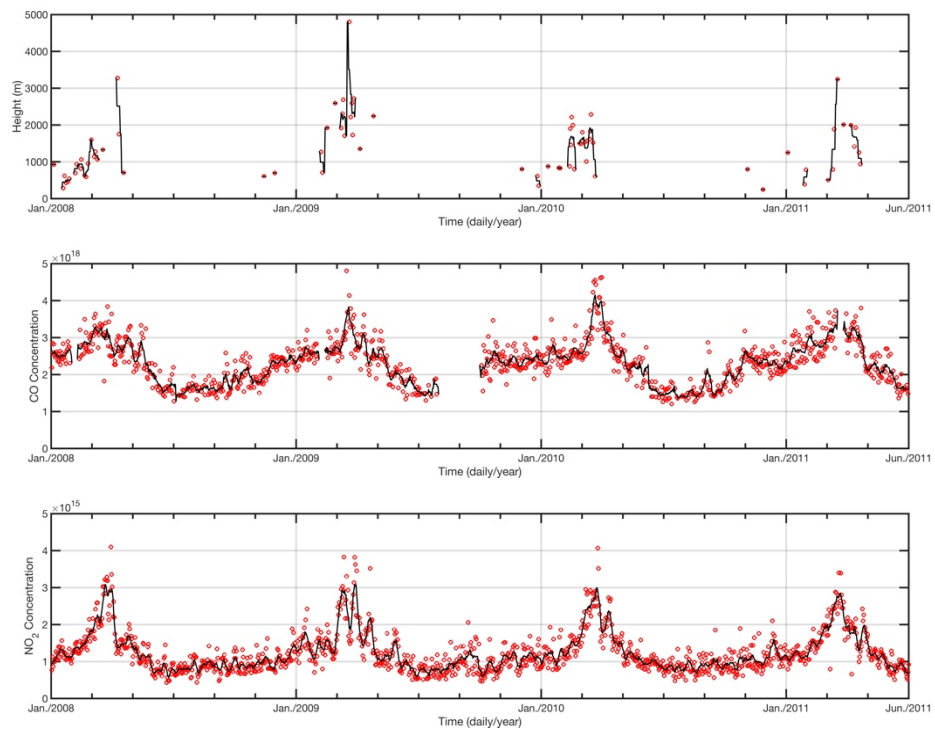

## (10) Northern Southeast Asia

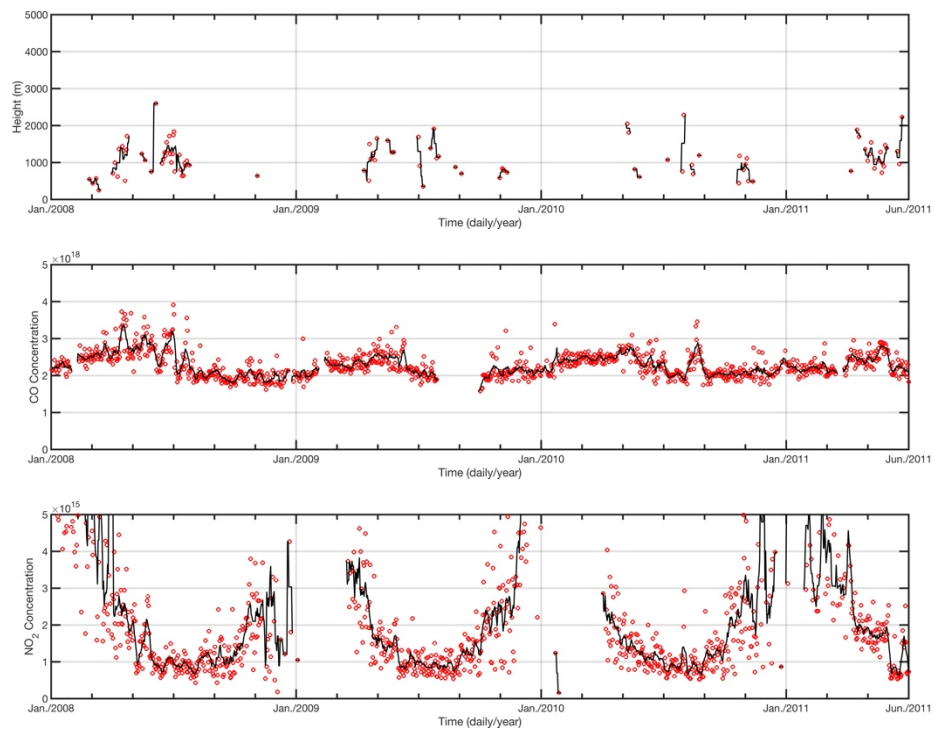

## (11) Siberia and North China

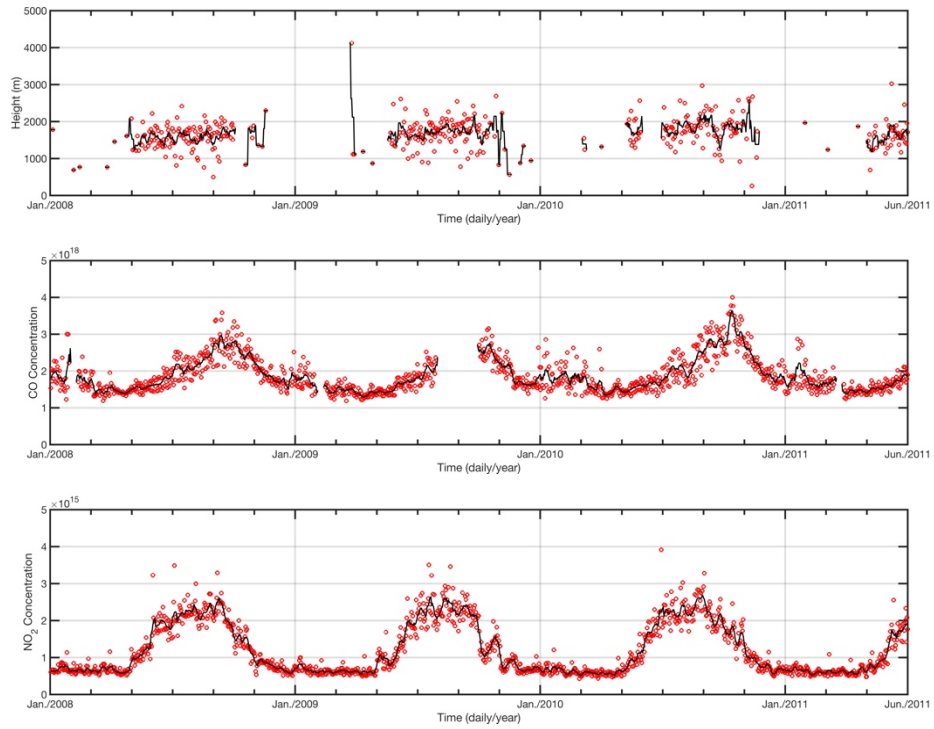

## (12) South Africa

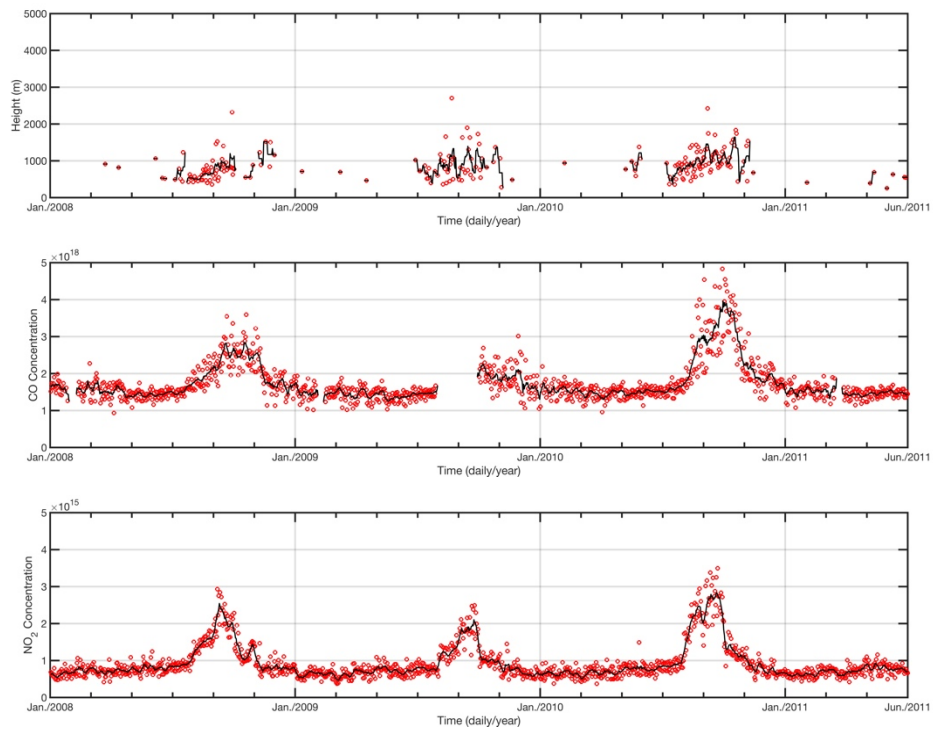

## (13) South America

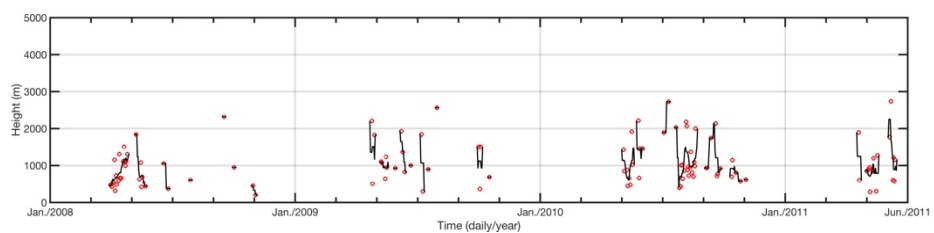



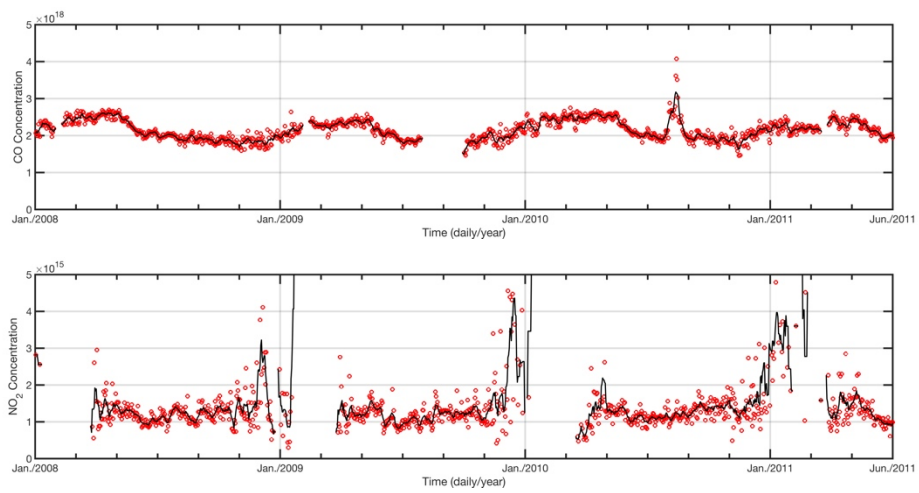

**(14) West Siberia**



**Figure S2: PDFs of the overall MISR height data in each region, and the corresponding PDFs over the plume rise model and regression model heights, where they are available. The total number of height measurements available is given in each legend.**

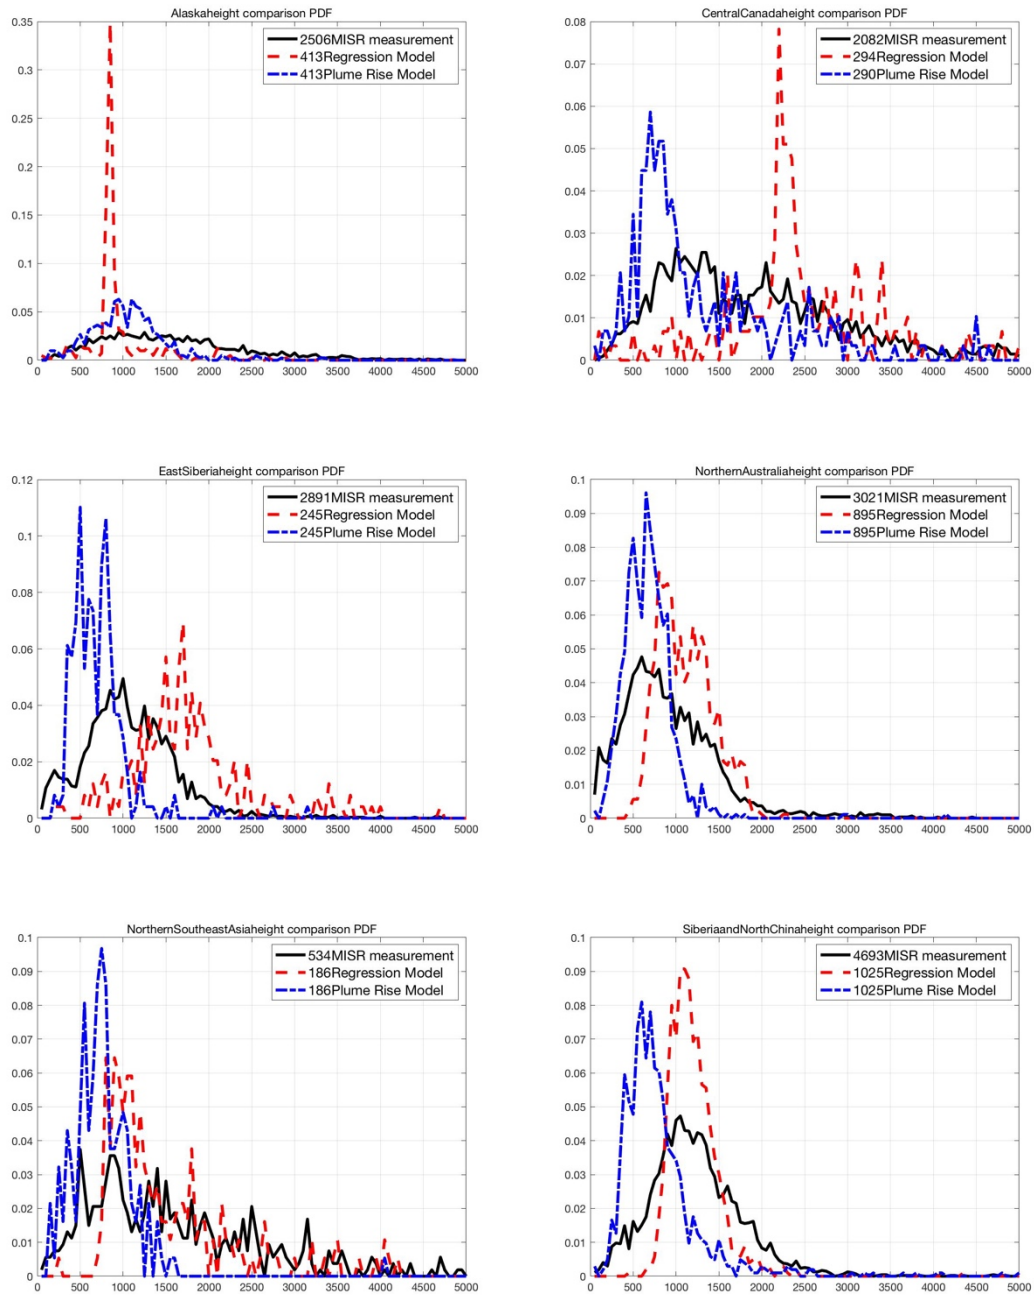

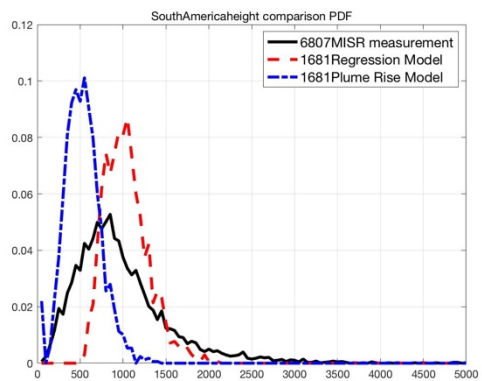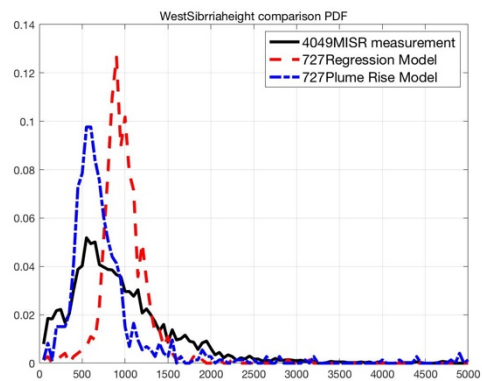

**Figure S3: Daily MISR measured heights in blue circles, with a 1 standard deviation range in blue lines. Plume rise model calculated heights in red boxes, and regression model calculated heights in black boxes, where available.**

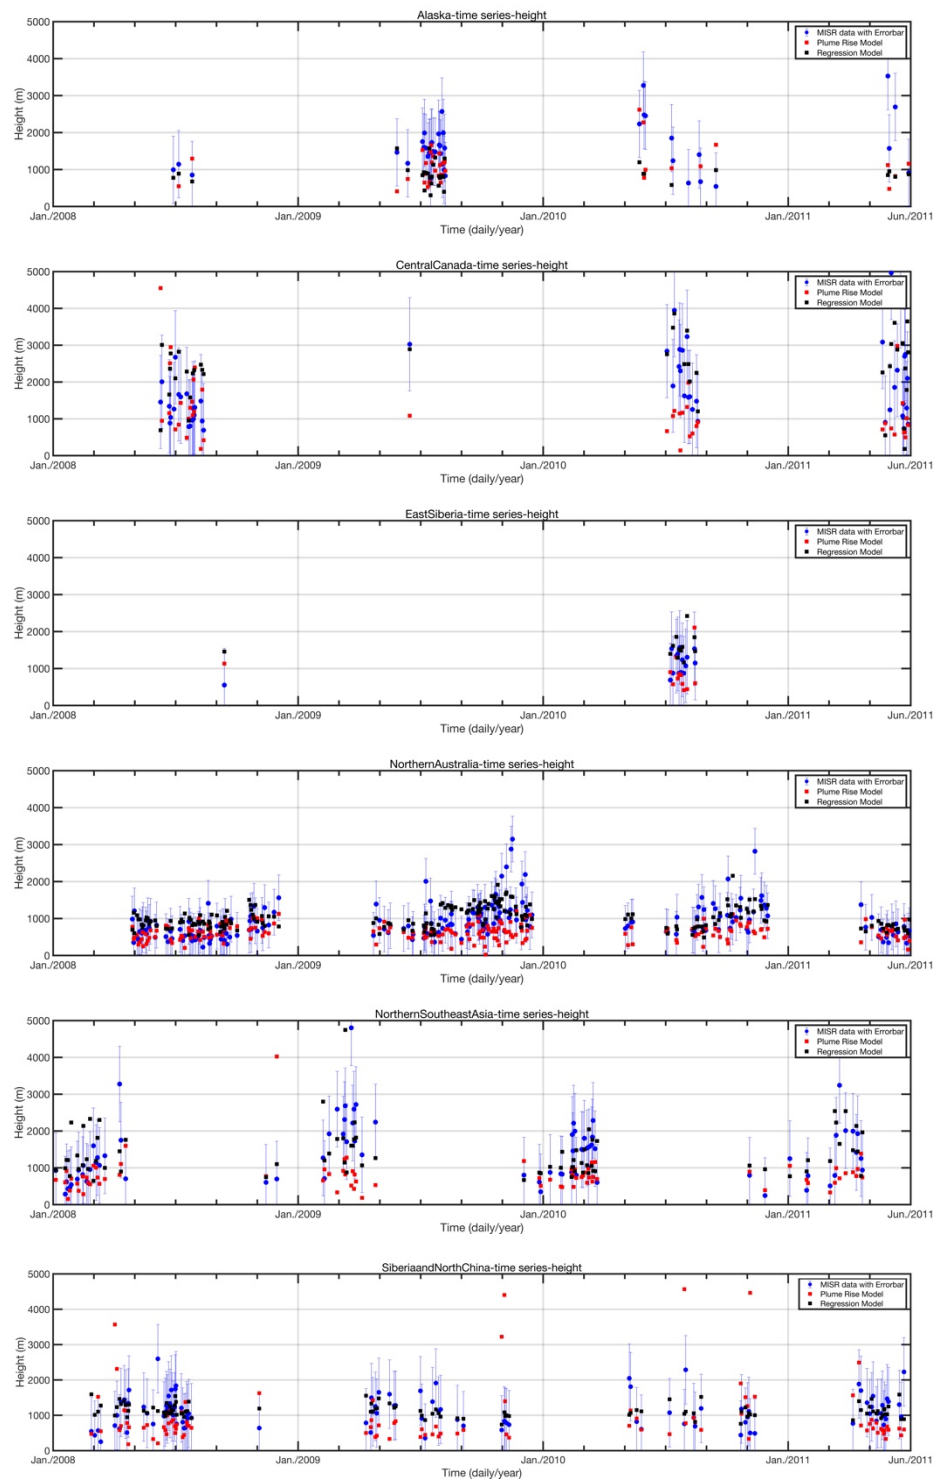

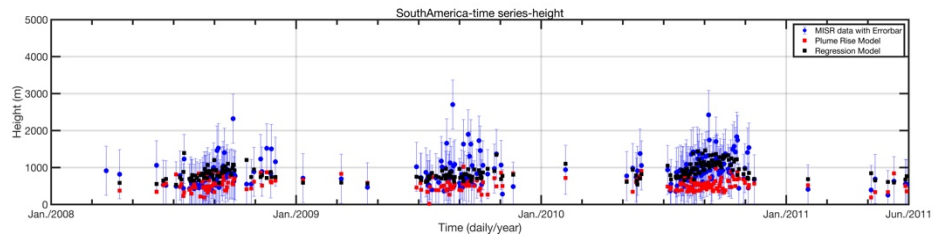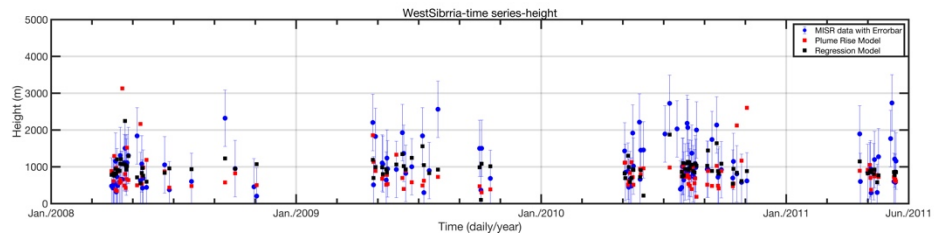

**Figure S4: Probability density functions (PDFs) of all measured MISR heights. The boundary between inside and outside is defined as 1 standard deviation from the mean. The total number of measurements within each range is given in the legend.**

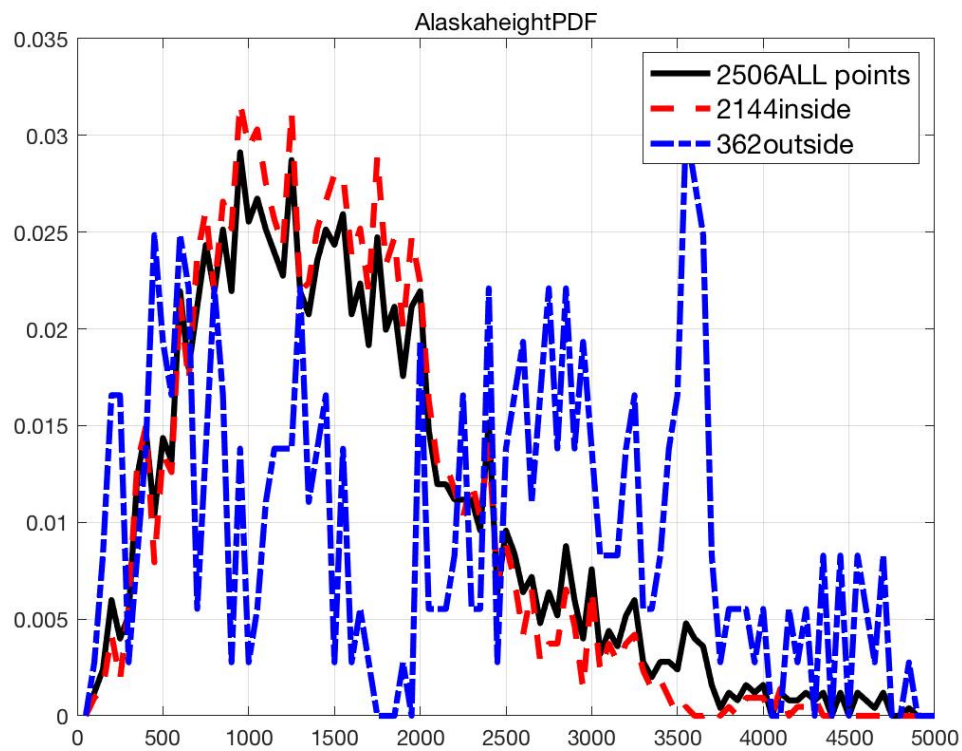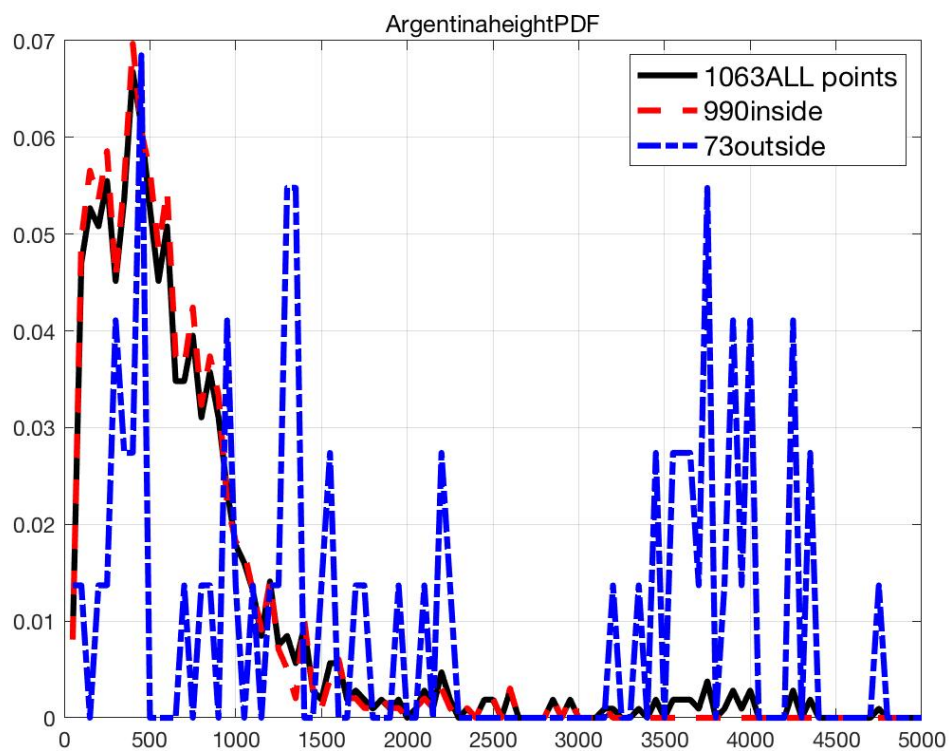

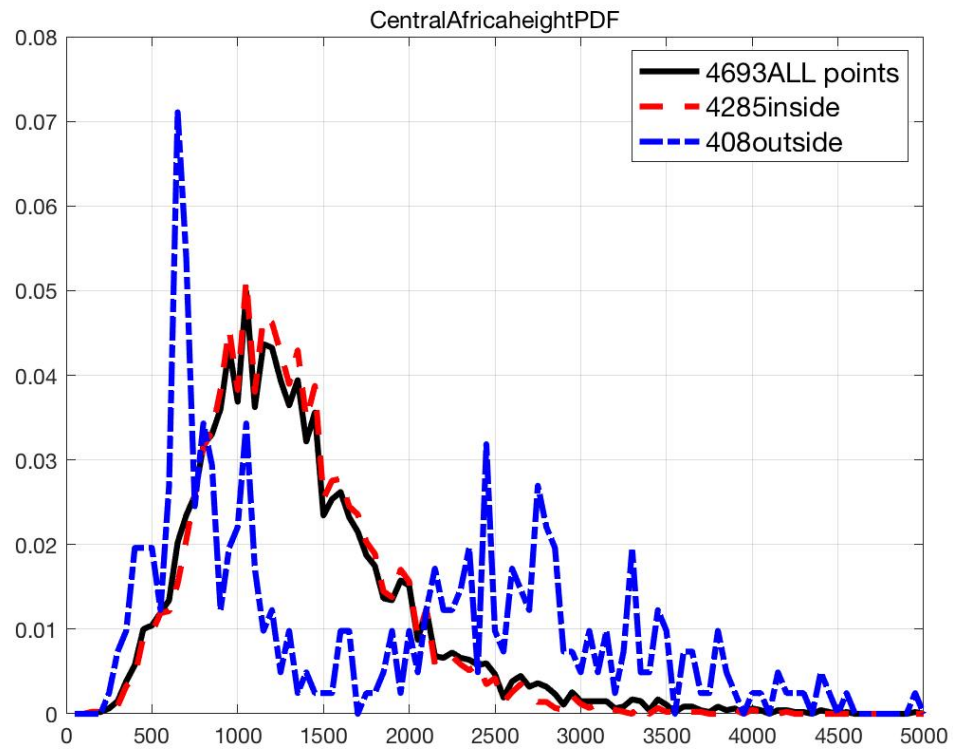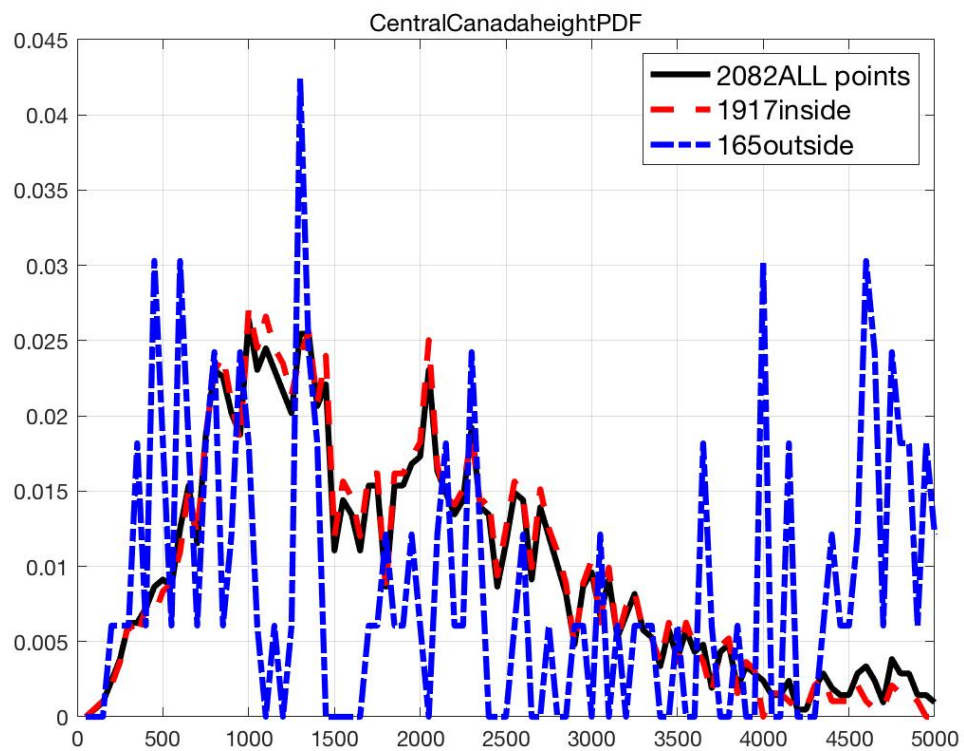



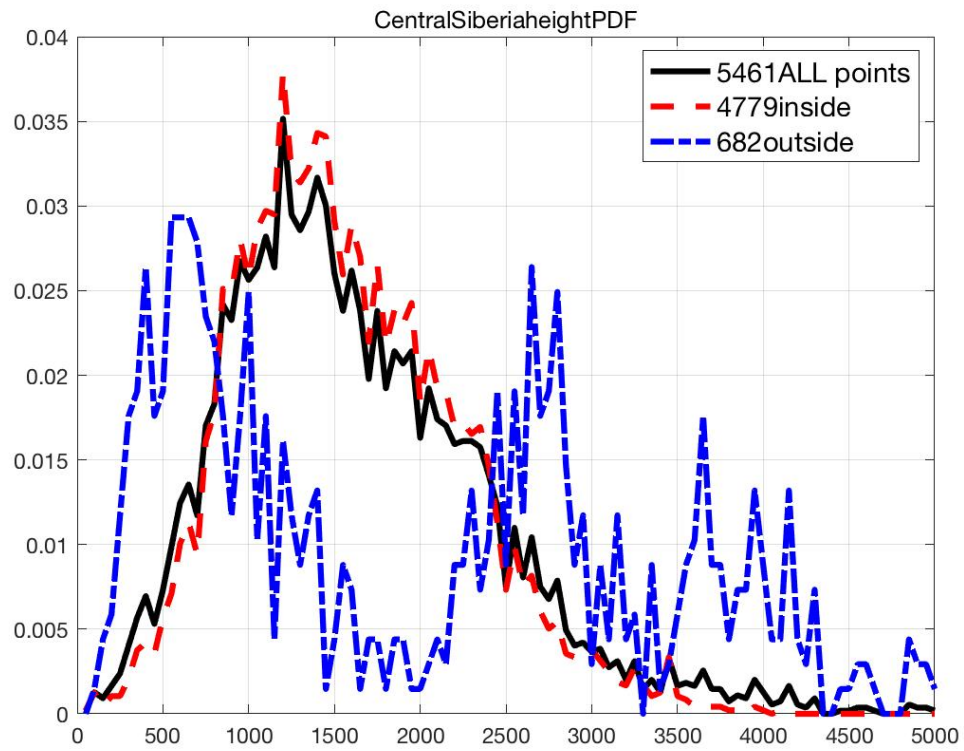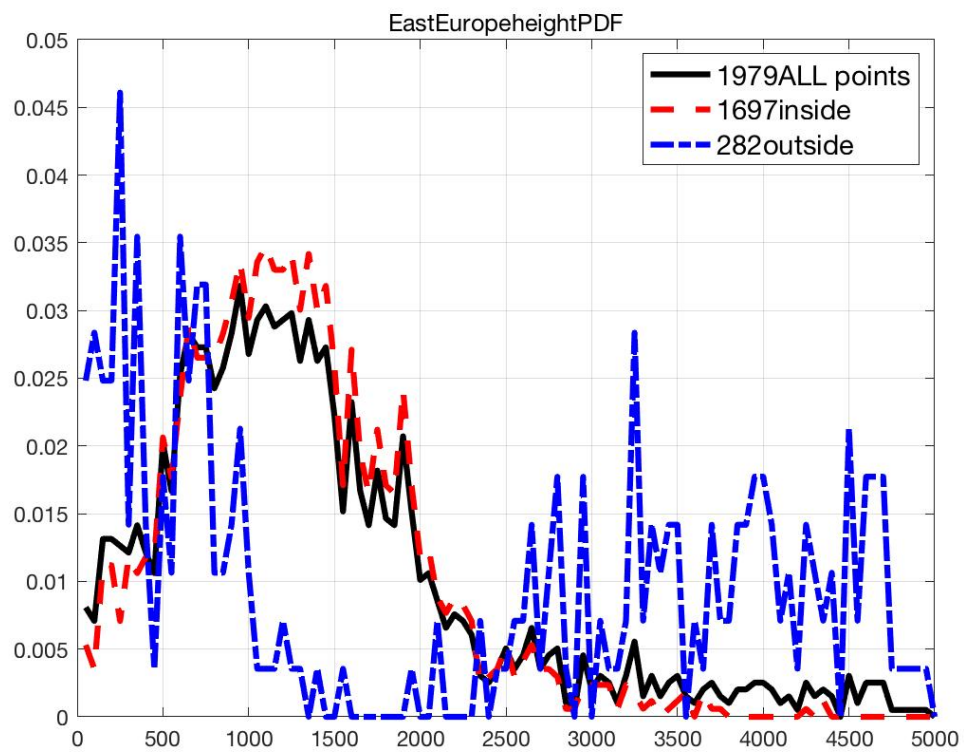



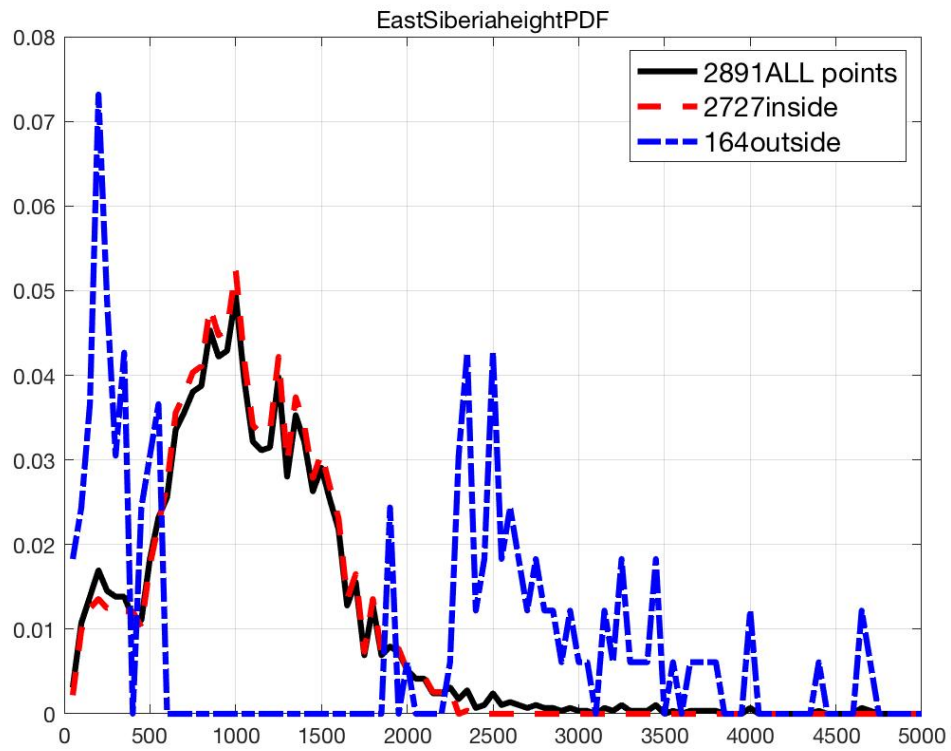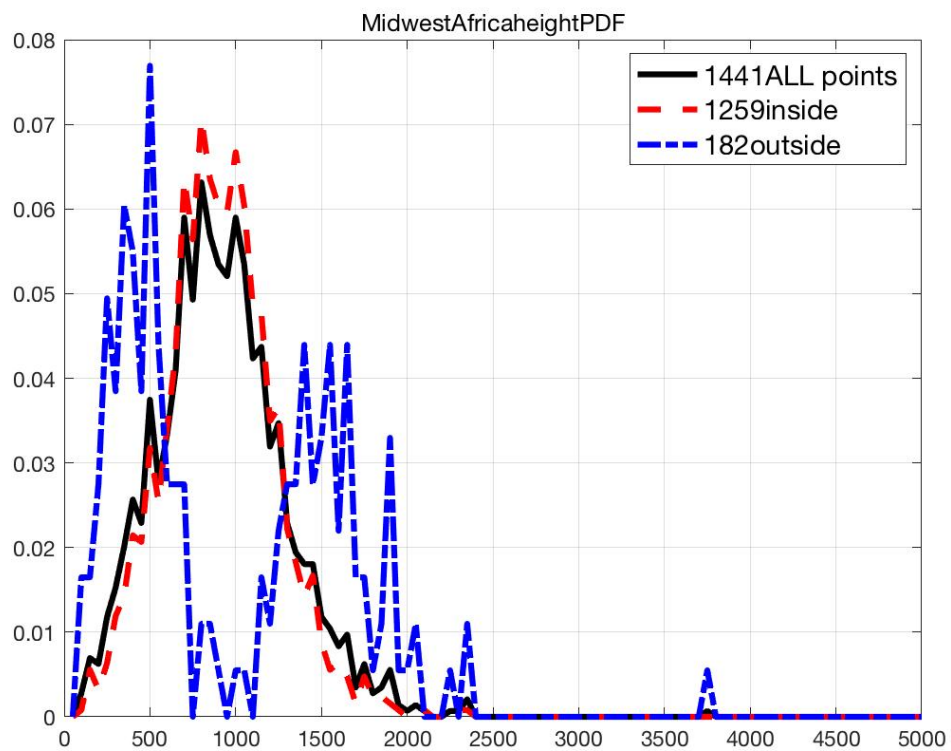

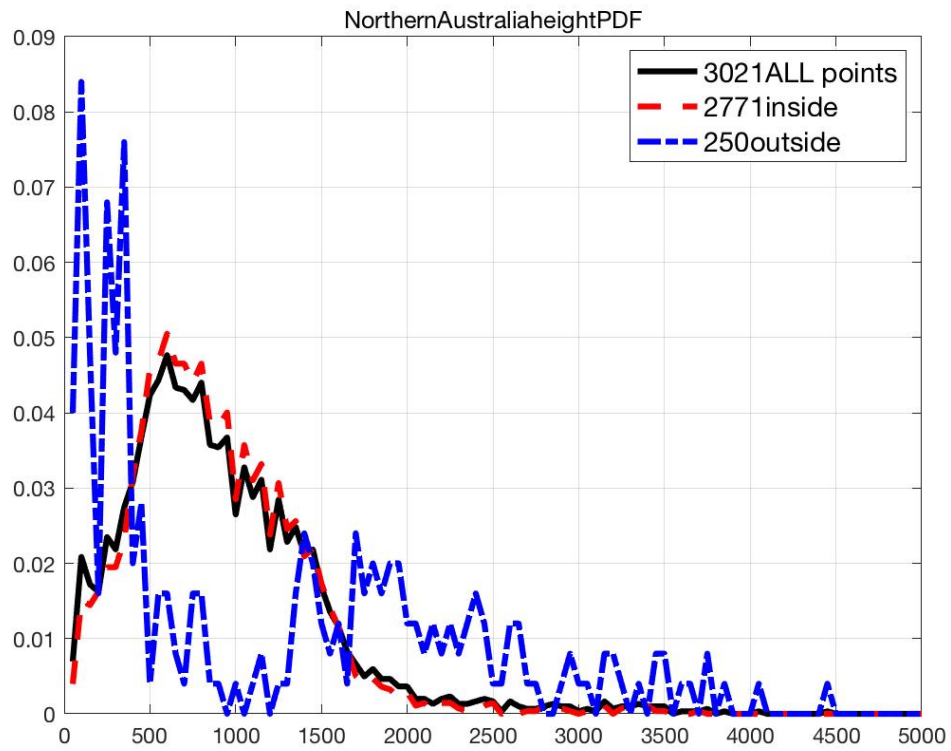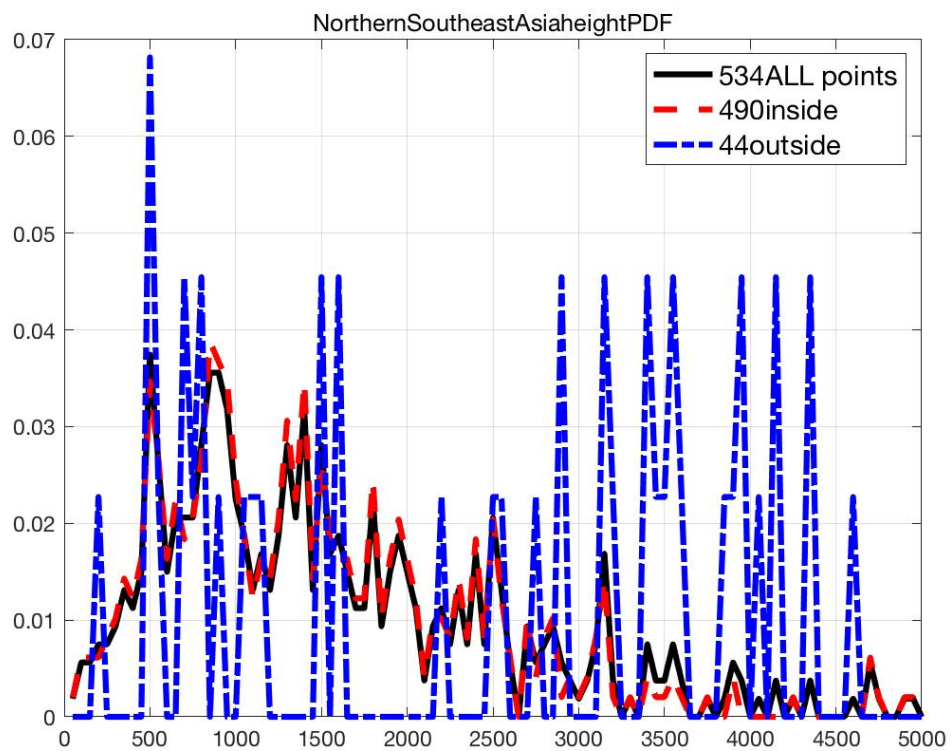

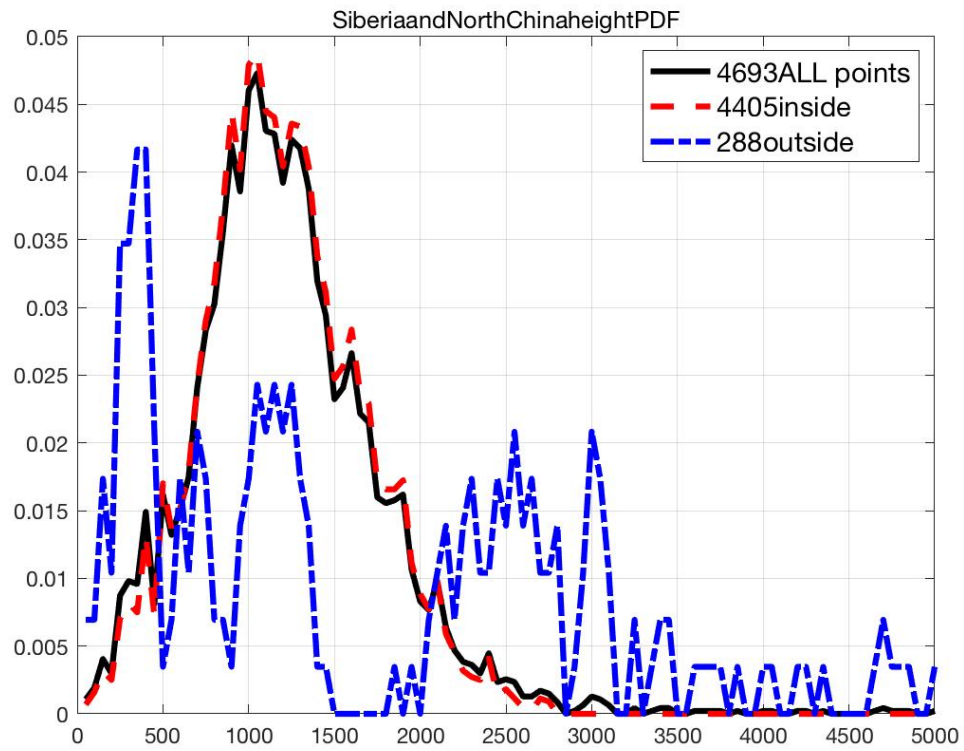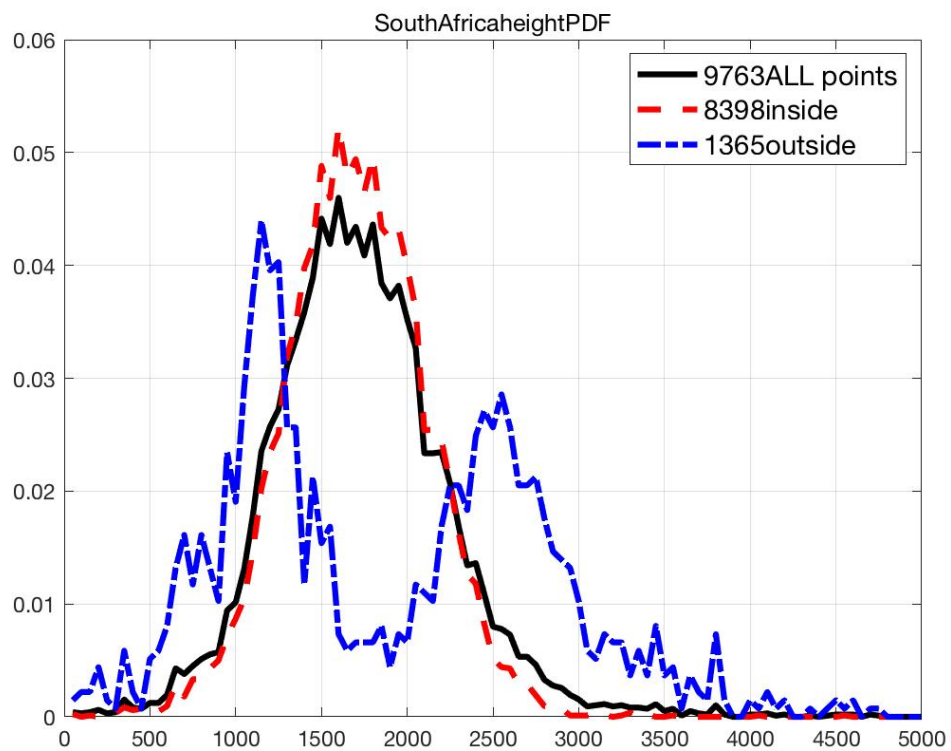

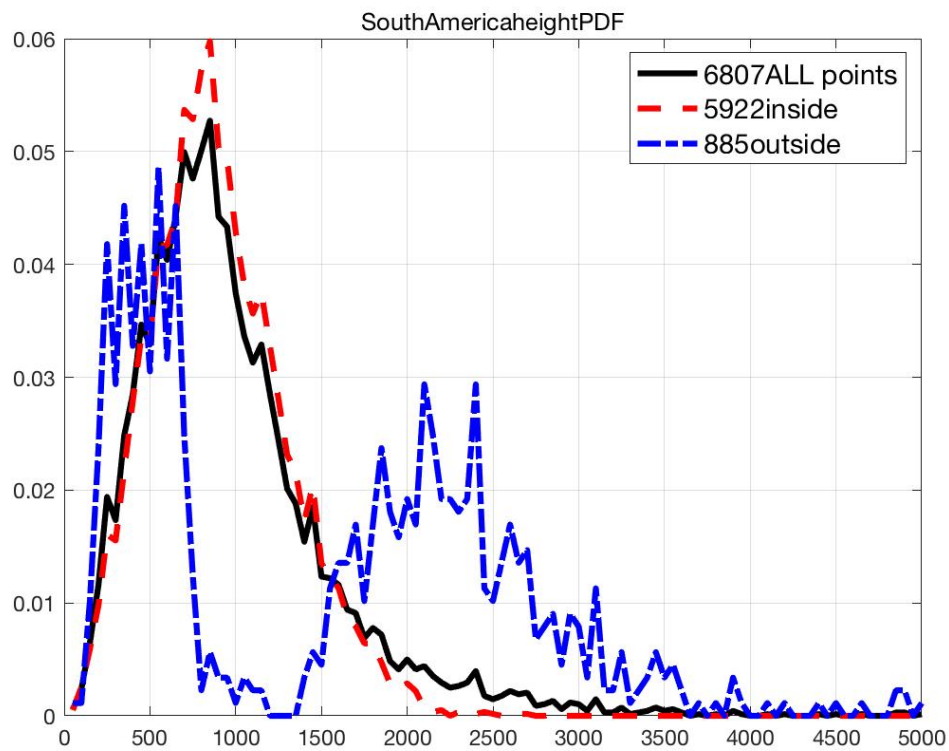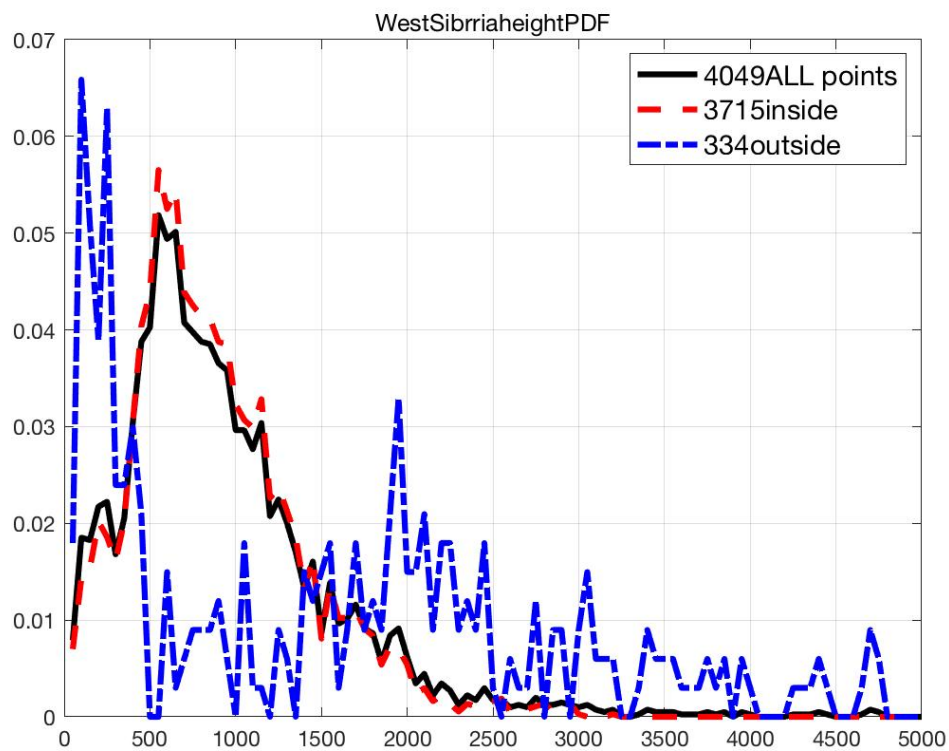

Supplement: Supplementary file 1 [file acp-2019-1017-supplement.pdf]
